# Supplementary material for: Degradable cross-linked polymeric microsphere for enhanced oil recovery applications
Source: Royal Society of Chemistry journal article supplement (doi:10.1039/c5ra05366h), 2015-01-01
Supplement: c5ra05366h10.pdf [file c5ra05366h10.pdf]

**Table 1** Basic parameters of sandpacks

| Code | $L/cm$ | $D/cm$ | $\Phi /%$ | $K_{rw}/10^{-3}\mu m^2$ | $S_o /%$ |
|------|--------|--------|-----------|-------------------------|----------|
| 1#   | 50     | 2.5    | 33.2      | 1695.6                  | 65.4     |
| 2#   | 50     | 2.5    | 35.1      | 2532.4                  | 69.8     |
| 3#   | 50     | 2.5    | 27.8      | 925.3                   | 73.2     |

**Table 3** Recipe of DCPM

| $W_{AM}/W_{AMPS}/W_{HM}$ | Monomers /% | Emulsifier /% | $W_{S-80}/W_{OP-10}$ | $V_{oil}/V_{water}$ | PEG-200 diacrylate/% | V-50 /% |
|--------------------------|-------------|---------------|----------------------|---------------------|----------------------|---------|
| 20/5/0.1                 | 20          | 6             | 6.5/1                | 1.5/1               | 1                    | 1       |

**Table 4** The effect of initiator on the polymerization

| Initiator                                          | Dosage | Reaction Temperature | The reaction phenomena                                                                                                |
|----------------------------------------------------|--------|----------------------|-----------------------------------------------------------------------------------------------------------------------|
| azodiisobutyronitrile (AIBN)                       | 0.2%   | 65 °C                | The reaction is very fast in about 5~10min, the reaction system is not stable and is easy to explosive polymerization |
|                                                    | 0.4%   |                      |                                                                                                                       |
|                                                    | 0.6%   |                      |                                                                                                                       |
|                                                    | 0.8%   |                      |                                                                                                                       |
| 2'-azobis(2-amidinopropane) dihydrochloride (V-50) | 0.2%   | 50 °C                | Un-react                                                                                                              |
|                                                    | 0.4%   |                      | The reaction occurred in 40min, the conversion can reach to more than 80%, uniform products                           |
|                                                    | 0.6%   |                      | The reaction occurred in about 20~30min, the conversion can reach to more than 80%, uniform products                  |
|                                                    | 0.8%   |                      | Explosive polymerization                                                                                              |
| redox system ( $K_2S_2O_8/NaHSO_3$ )               | 0.2%   | 40 °C                | Un-react                                                                                                              |
|                                                    | 0.4%   |                      | The reaction occurred in about 8-9 hours                                                                              |
|                                                    | 0.6%   |                      | The reaction occurred in about 5-6 hours and the reaction system is not stable                                        |
|                                                    | 0.8%   |                      | Explosive polymerization                                                                                              |
