# Supplementary figures and images for: Degradable cross-linked polymeric microsphere for enhanced oil recovery applications
Source: Royal Society of Chemistry journal article supplement (doi:10.1039/c5ra05366h), 2015-01-01

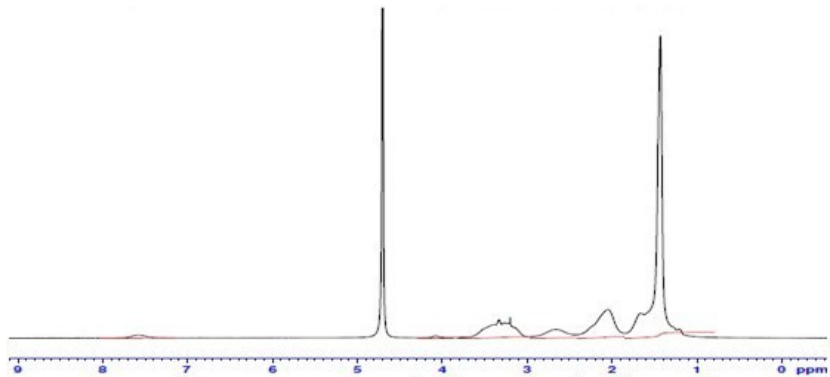

Supplement: c5ra05366h2.pdf [file c5ra05366h2.pdf]

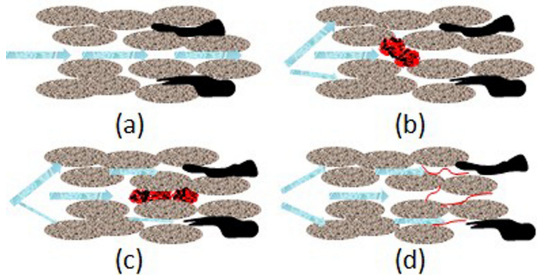

Supplement: c5ra05366h3.pdf [file c5ra05366h3.pdf]

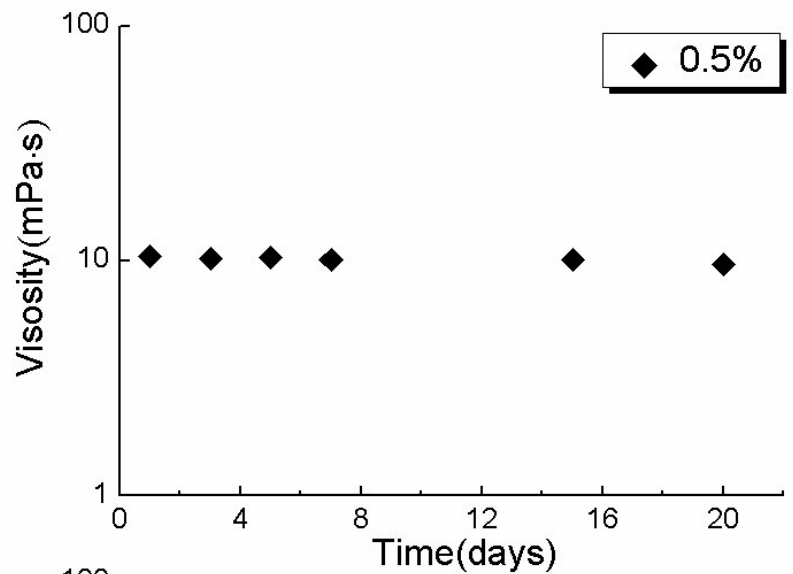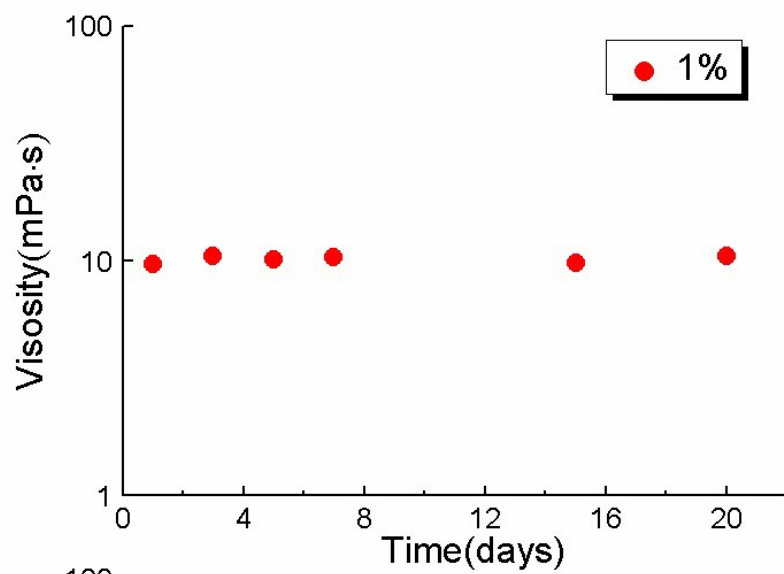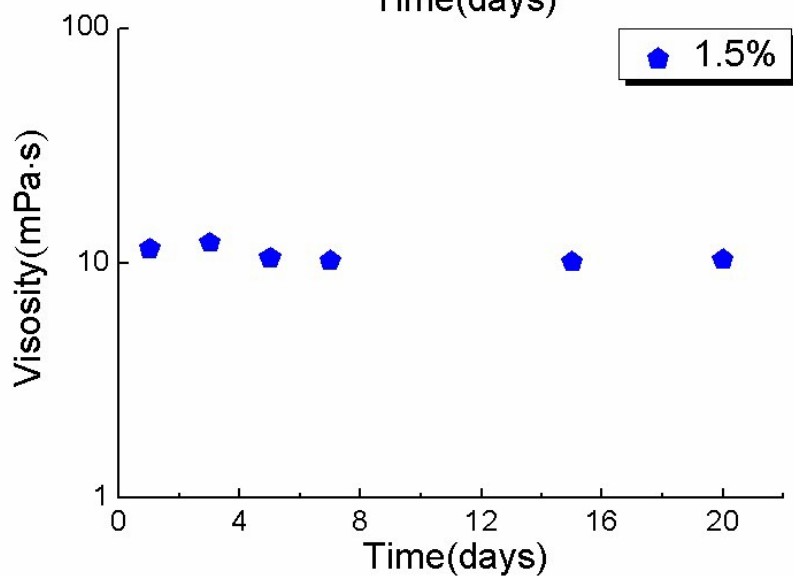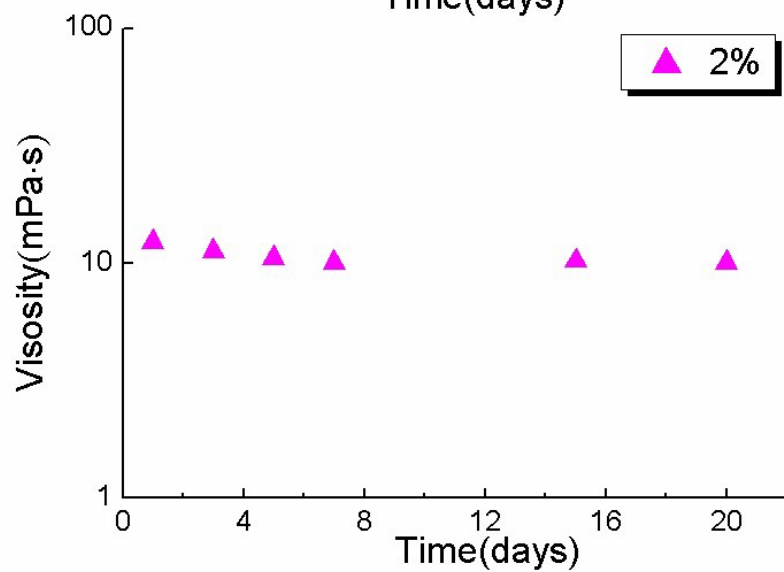

Supplement: c5ra05366h4.pdf [file c5ra05366h4.pdf]

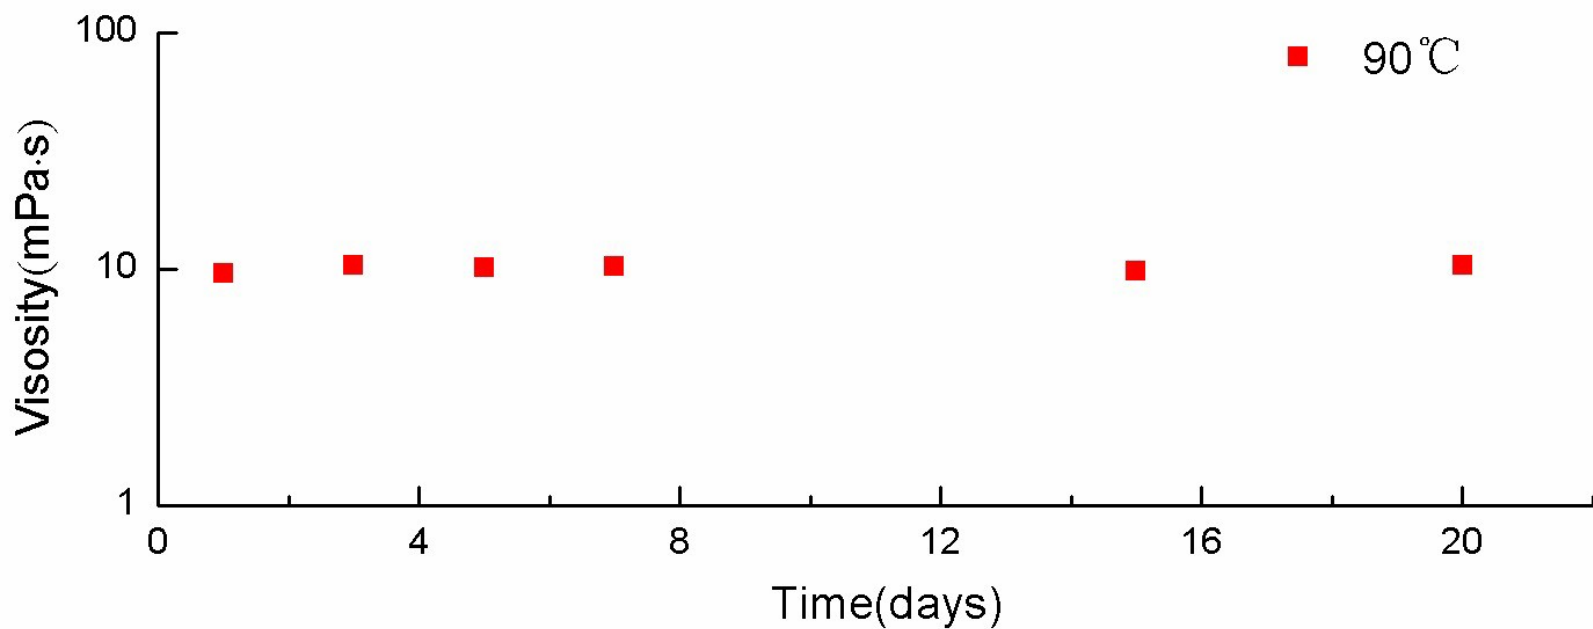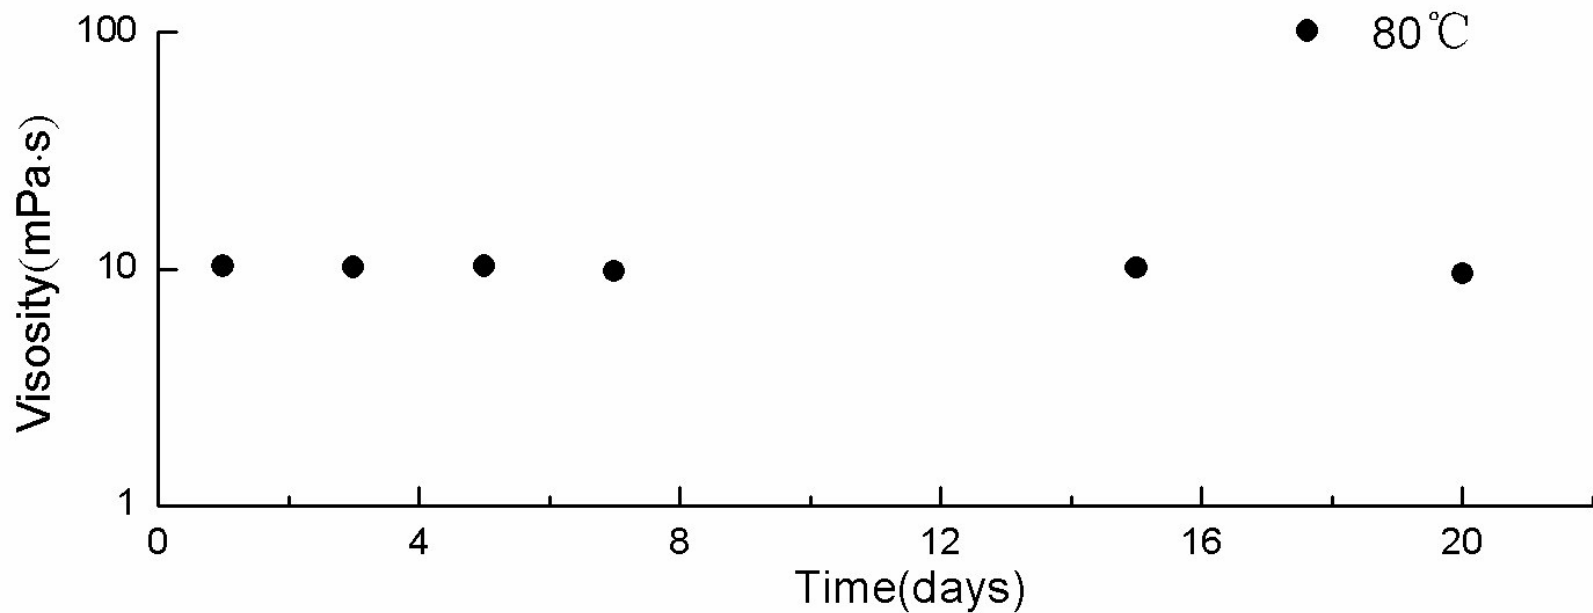

Supplement: c5ra05366h5.pdf [file c5ra05366h5.pdf]

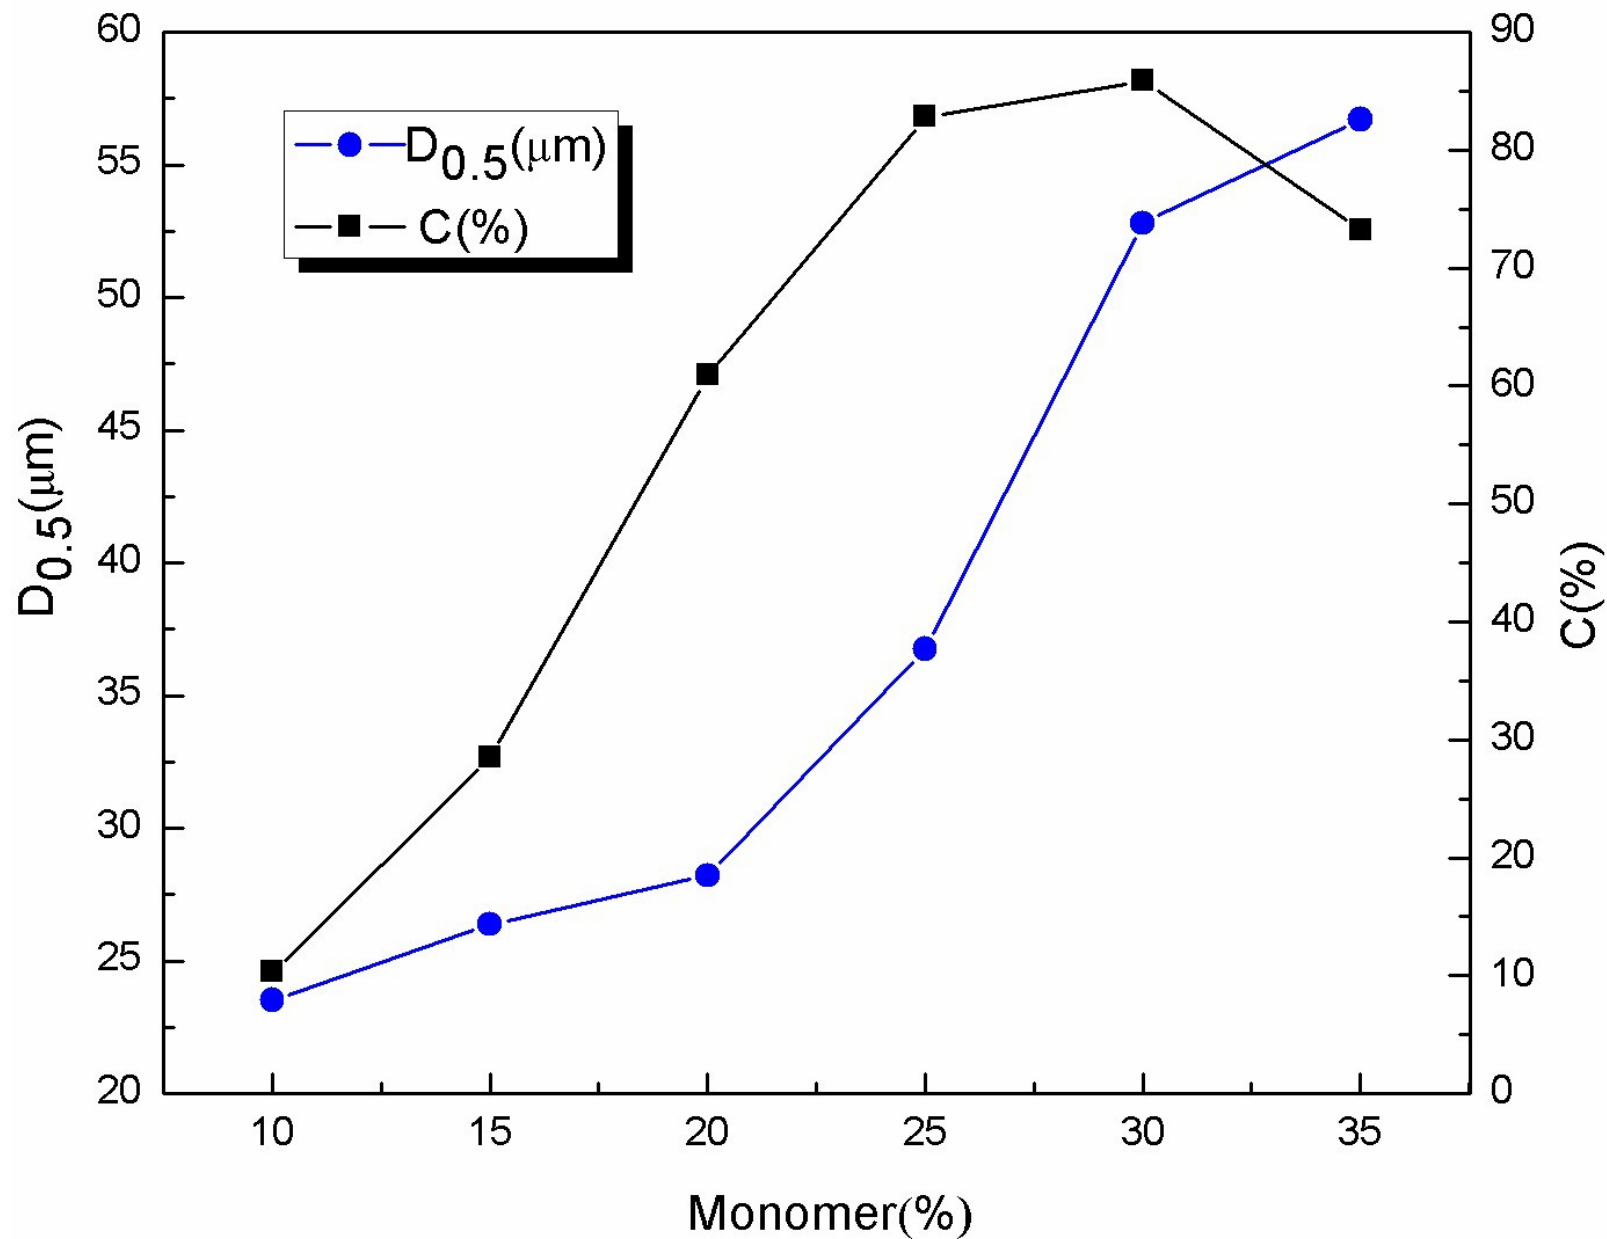

Supplement: c5ra05366h6.pdf [file c5ra05366h6.pdf]

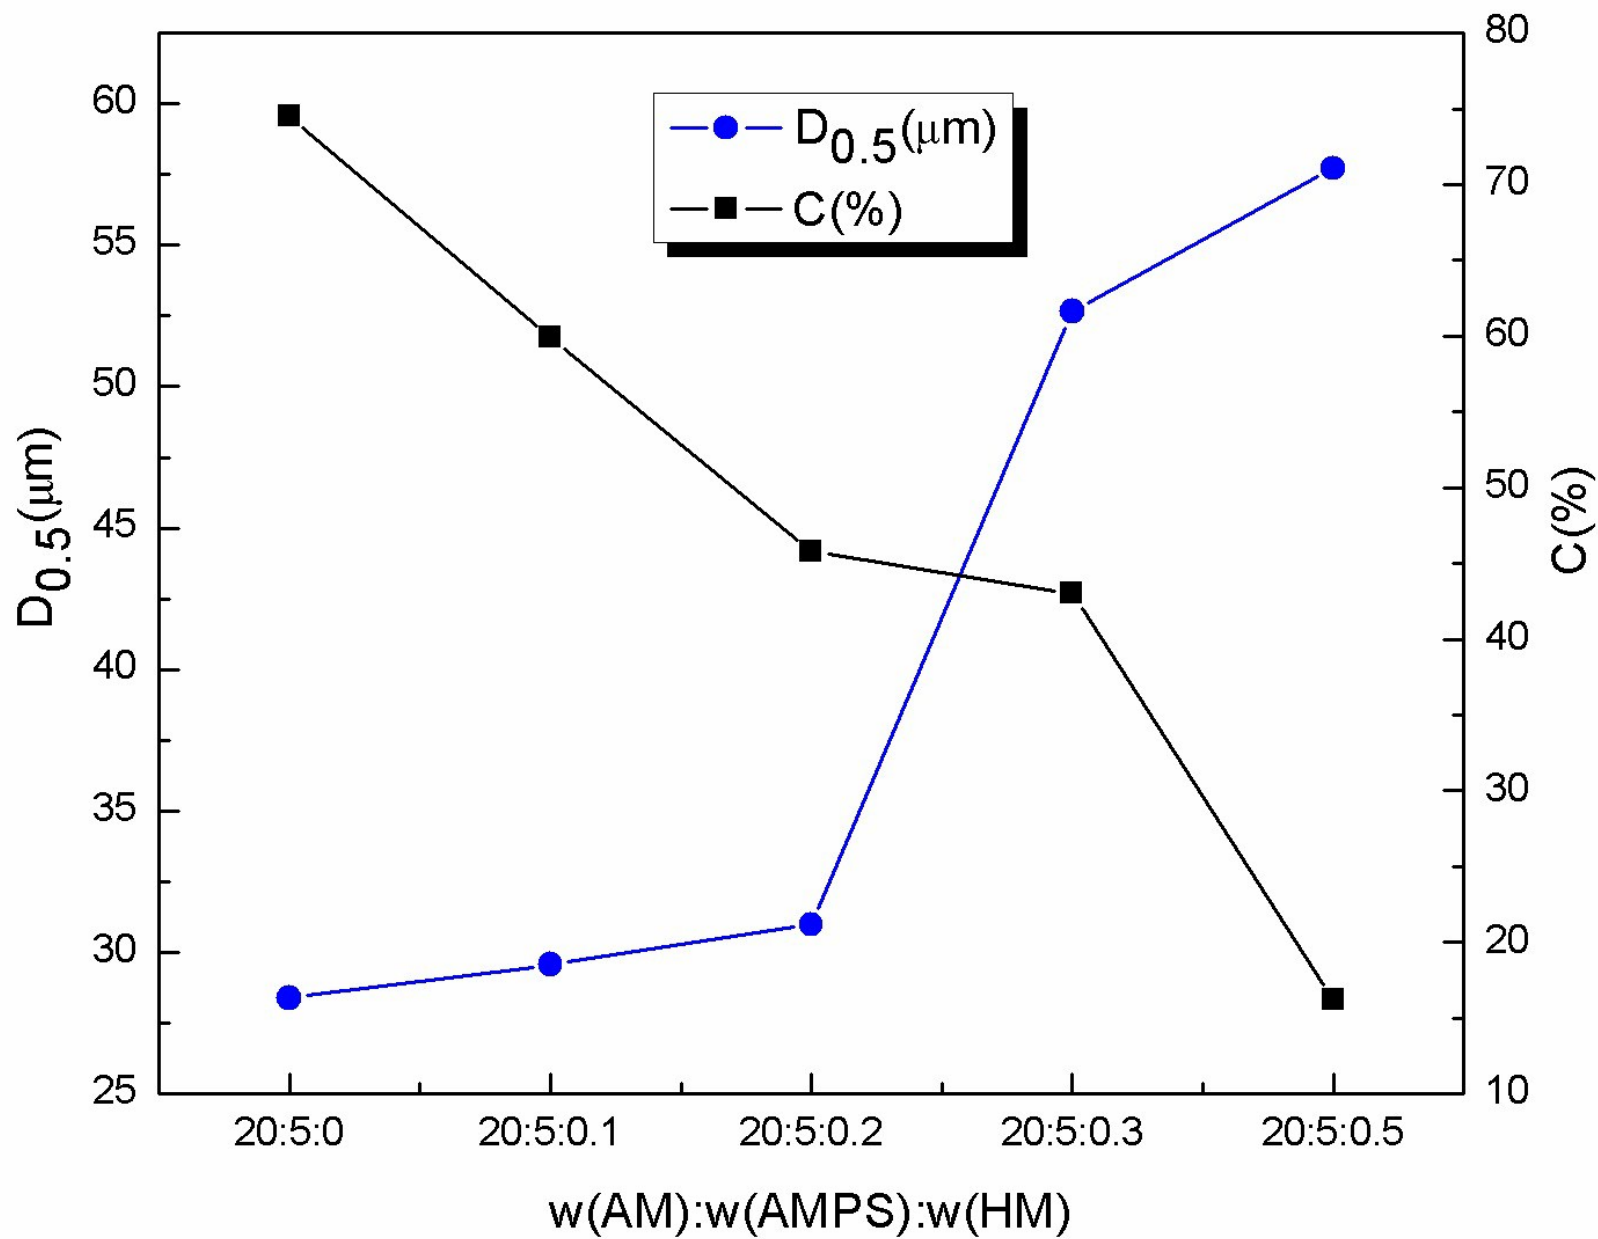

Supplement: c5ra05366h7.pdf [file c5ra05366h7.pdf]

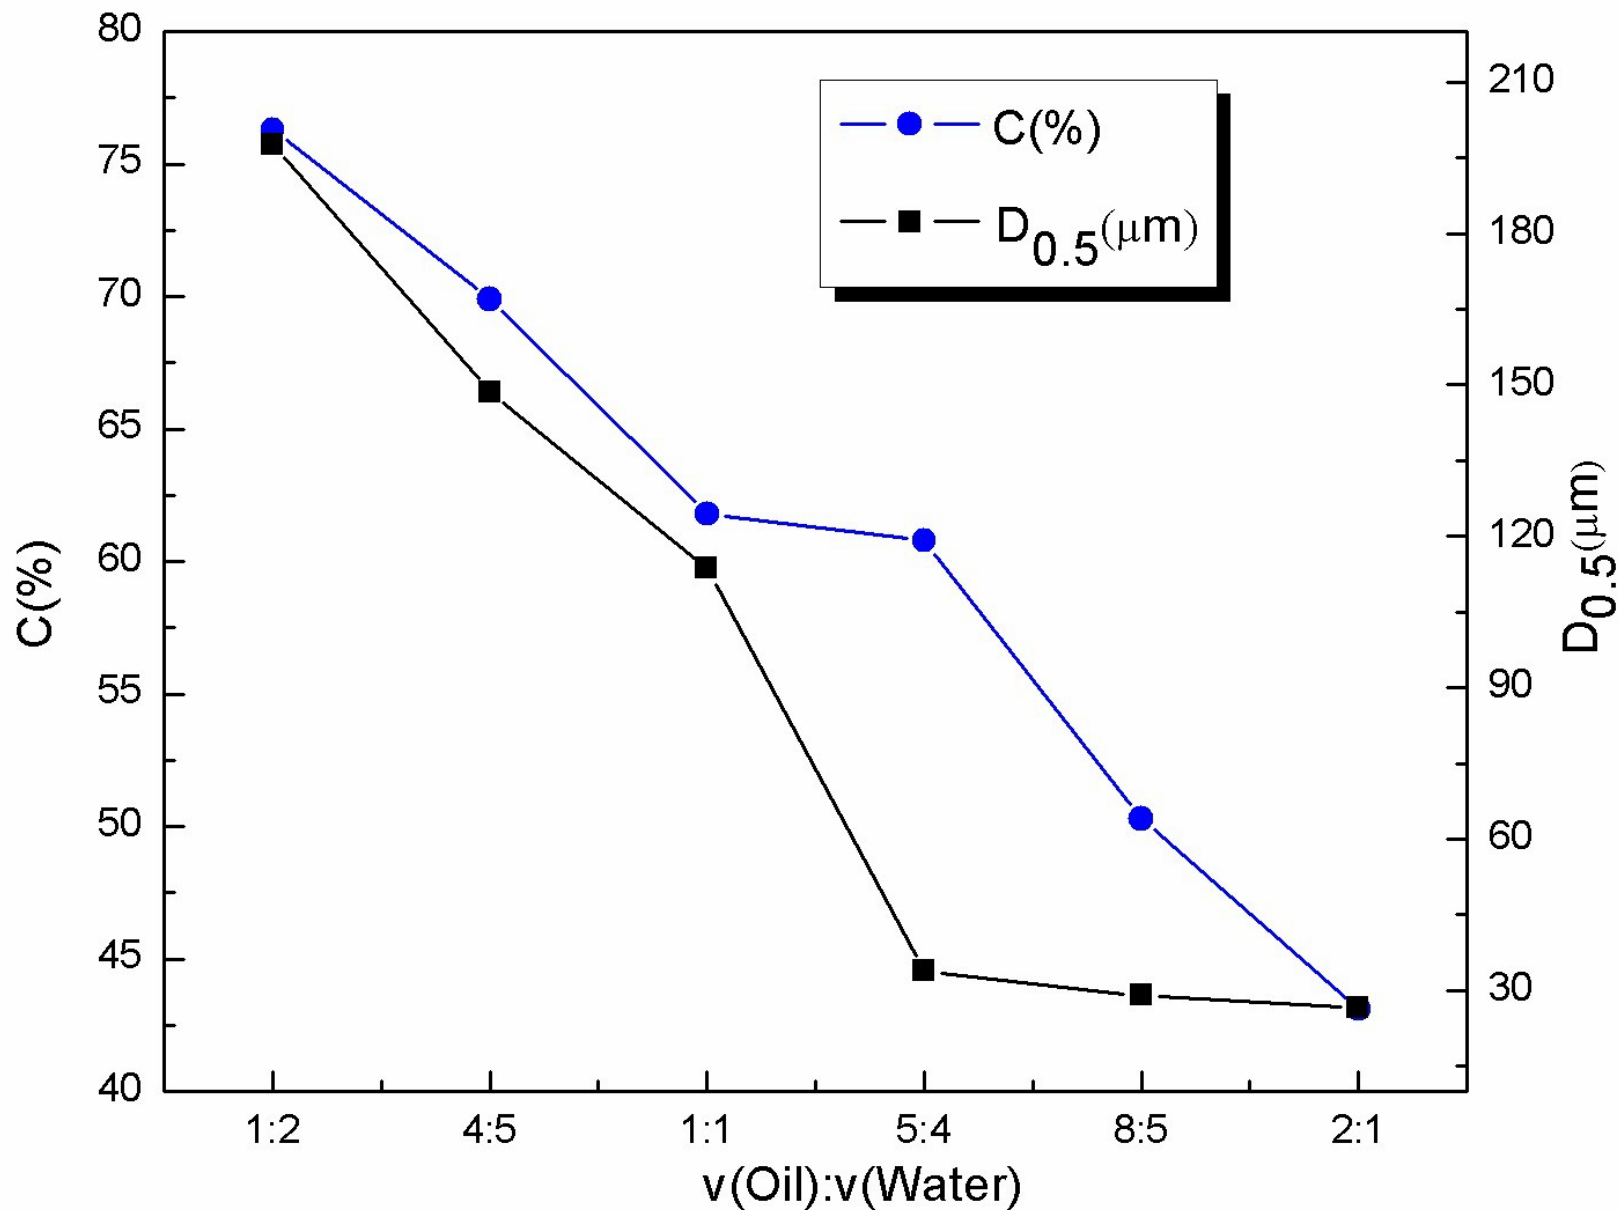

Supplement: c5ra05366h8.pdf [file c5ra05366h8.pdf]

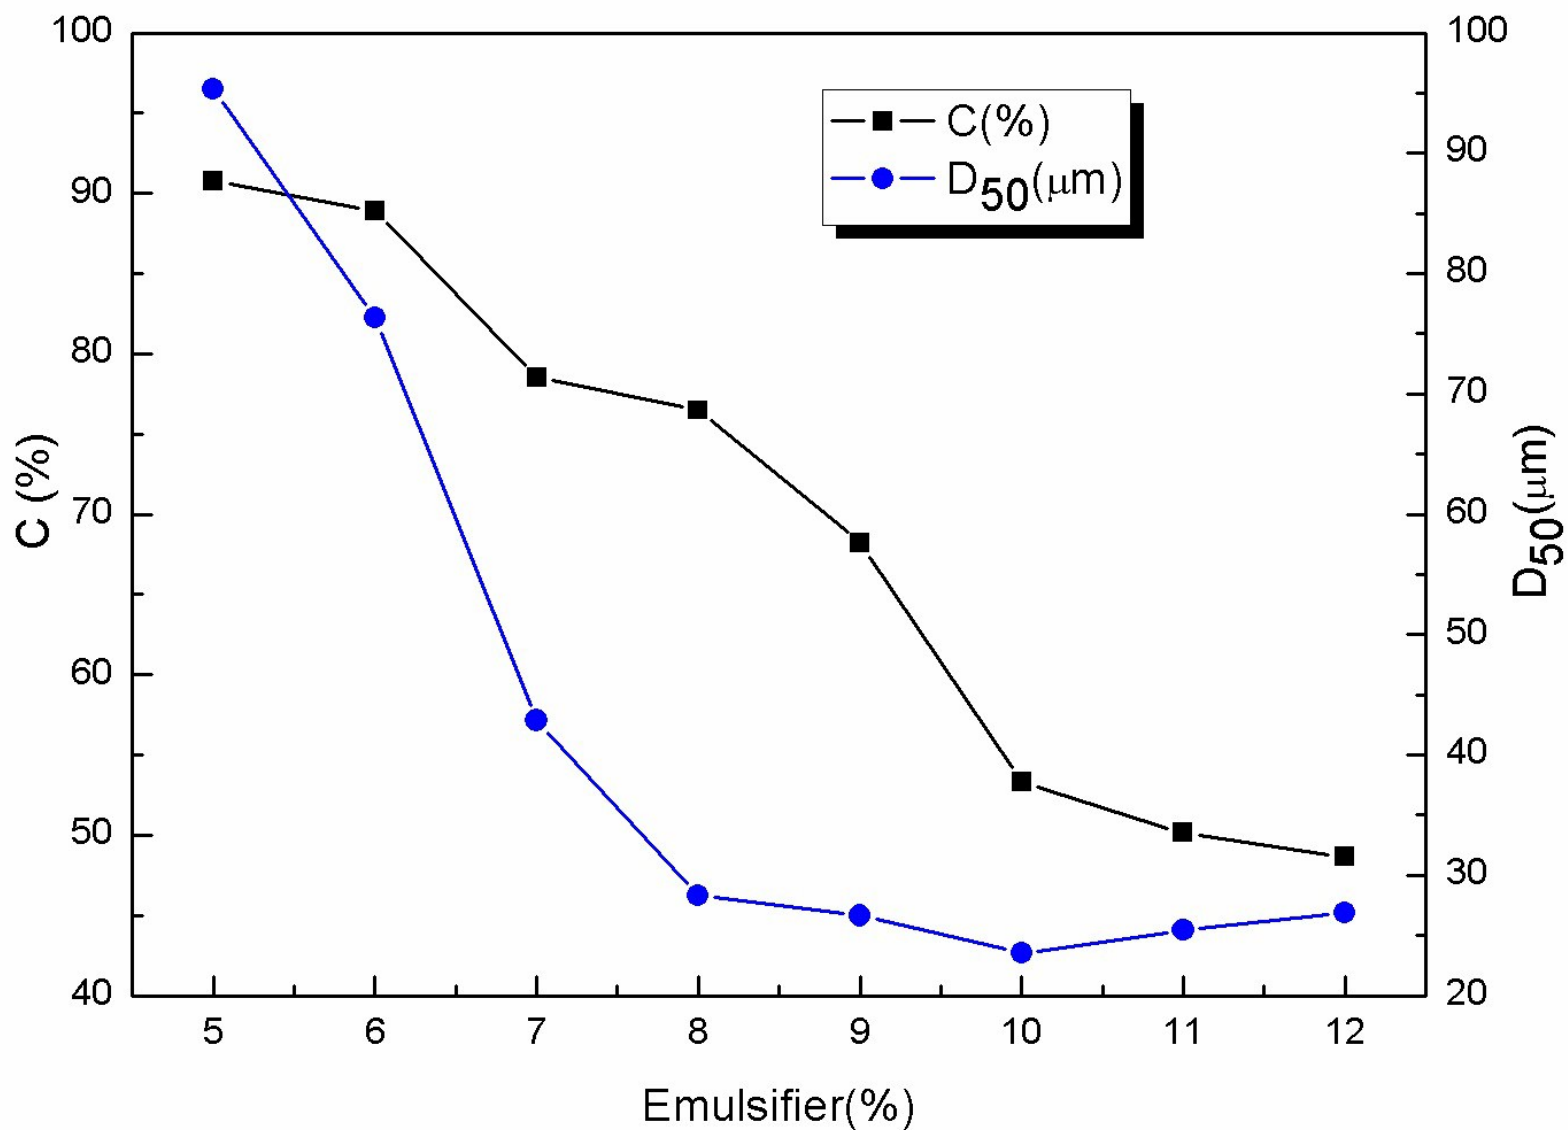

Supplement: c5ra05366h9.pdf [file c5ra05366h9.pdf]
